# Supplementary material
Source: PubMed Central journal article supplement (PMC4862526)
Supplement: AAC.02930-15_zac005165096so1.pdf [file AAC.02930-15_zac005165096so1.pdf]

## Supplemental material

### **Microdiversity of TEM $\beta$ -lactamases: a network analysis of sequence-function relationships and exploration of sequence space**

Catharina Zeil, Michael Widmann, Silvia Fademrecht, Constantin Vogel, Jürgen Pleiss<sup>§</sup>

Institute of Technical Biochemistry, University of Stuttgart,  
Allmandring 31, 70569 Stuttgart, Germany

<sup>§</sup>Corresponding author

Jürgen Pleiss

Institute of Technical Biochemistry

Allmandring 31

70569 Stuttgart, Germany

E-mail: Juergen.Pleiss@itb.uni-stuttgart.de

Phone: (+49) 711685 63191

Fax: (+49) 711685 63196

**Table S1** Sequences that were identical to at least one other sequence after removing the residues outside of the core region (24-280)

| Representative variant |                |           | Identical variants |          |           |
|------------------------|----------------|-----------|--------------------|----------|-----------|
| ID                     | name           | phenotype | ID                 | name     | phenotype |
| 64                     | TEM-34, TEM-97 | 2br       | 292                | TEML-150 | -         |
| 764                    | TEM-71         | 2be       | 666                | TEM-188  | 2be       |
| 313                    | TEM-110        | -         | 357                | TEM-168  | -         |
| 317                    | TEM-171        | -         | 15                 | TEML-267 | -         |
| 111                    | TEM-181        | -         | 412                | TEML-48  | -         |
| 396                    | TEM-122        | 2br       | 668                | TEM-163  | -         |
| 818                    | TEM-1          | 2b        | 62                 | TEML-273 | -         |
|                        |                |           | 112                | TEM-214  | -         |
|                        |                |           | 138                | TEML-285 | -         |
|                        |                |           | 295                | TEML-308 | -         |
|                        |                |           | 451                | TEML-318 | -         |
|                        |                |           | 479                | TEM-206  | 2b        |
|                        |                |           | 480                | TEML-254 | -         |
|                        |                |           | 482                | TEML-324 | -         |
|                        |                |           | 538                | TEML-132 | -         |
|                        |                |           | 569                | TEML-335 | -         |
|                        |                |           | 573                | TEML-265 | -         |
|                        |                |           | 626                | TEML-212 | -         |
|                        |                |           | 672                | TEML-349 | -         |
|                        |                |           | 702                | TEML-352 | -         |
|                        |                |           | 737                | TEML-225 | -         |
|                        |                |           | 744                | TEML-357 | -         |
|                        |                |           | 769                | TEML-362 | -         |
|                        |                |           | 132                | TEM-98   | -         |
| 923                    | TEM-65         | 2br       | 84                 | TEM-67   | 2br       |
| 63                     | TEM-47         | 2be       | 507                | TEM-48   | 2be       |
| 779                    | TEM-52         | 2be       | 229                | TEM-92   | 2be       |
| 910                    | TEM-32         | 2br       | 492                | TEM-159  | 2br       |
| 10                     | TEM-29         | 2be       | 535                | TEM-115  | 2be       |
| 286                    | TEM-19         | 2be       | 604                | TEM-120  | 2be       |
| 256                    | TEM-20         | 2be       | 625                | TEML-344 | -         |
| 197                    | TEM-30, TEM-99 | 2br       | 261                | TEML-303 | -         |
|                        |                |           | 557                | TEML-151 | -         |

**Table S1 continued**

| Representative variant |         |           | Identical variants |          |           |
|------------------------|---------|-----------|--------------------|----------|-----------|
| ID                     | name    | phenotype | ID                 | name     | phenotype |
| 783                    | TEM-116 | 2b        | 161                | TEML-47  | -         |
|                        |         |           | 267                | TEML-304 | -         |
|                        |         |           | 273                | TEML-81  | -         |
|                        |         |           | 328                | TEML-41  | -         |
|                        |         |           | 476                | TEML-322 | -         |
|                        |         |           | 517                | TEML-72  | -         |
|                        |         |           | 553                | TEML-51  | -         |
|                        |         |           | 673                | TEML-350 | -         |
|                        |         |           | 715                | TEML-354 | -         |
|                        |         |           | 763                | TEML-361 | -         |
|                        |         |           | 123                | TEML-46  | -         |
|                        |         |           | 785                | TEML-367 | -         |
|                        |         |           | 812                | TEML-369 | -         |
| 300                    | TEM-57  | 2b        | 718                | TEML-149 | -         |
| 610                    | TEM-43  | 2be       | 929                | TEM-161  | -         |

**Table S2** Nodes that were isolated from the main network (m: sequence is of the right length, but the mutations differ, f: sequence is missing too many residues, l: the sequence is too long).

| ID  | Name     | Mutations                                                                                                                   | Reason | Lowest identity |
|-----|----------|-----------------------------------------------------------------------------------------------------------------------------|--------|-----------------|
| 206 | TEM-87   | Q6K, E104K, D163H, R164C, M182T                                                                                             | m      | 2               |
| 565 | TEML-93  | N-8, V84I, A184V, K192R, G236E, I282R, C-6                                                                                  | m      | 2               |
| 512 | TEML-202 | I5V, V31L, G54N, V84A, G87K                                                                                                 | m      | 4               |
| 368 | TEML-224 | N-10, I13K, P14A, F16C, A18K, G283V, A284P, C-6                                                                             | m      | 2               |
| 220 | TEML-235 | M272T, D273E                                                                                                                | m      | 2               |
| 611 | TEML-341 | N-23, W165Y, E166Y, P167G, M182T                                                                                            | m      | 2               |
| 31  | TEML-270 | N-24, 41--CRTSHR--42, G41P, A42C, V84I, E104K, A184V, E240R, Q269R, A270K, T271K, M272T, 290--<br>GLEQKLISEEDLNSAVDHHHHHH   | m      | 14              |
| 578 | TEM-151  | M69V, R164H, N276D, A284G                                                                                                   | m      | 2               |
| 695 | TEM-89   | Q39K, E104K, S130G, G238S, C-8                                                                                              | m/f    | 3               |
| 350 | TEML-74  | N-8, K34R, V84I, A184V, S243P, C-6                                                                                          | m      | 2               |
| 199 | TEML-135 | V84I, A184V, M211L, E212L                                                                                                   | m      | 2               |
| 649 | TEML-347 | N-11, M69I, M182T, C-11                                                                                                     | m/f    | 2               |
| 139 | TEM-205  | V84I, E104K, R164S, M182T, A184V                                                                                            | m      | 2               |
| 327 | TEM-194  | Q99R, L137I, G156R, N175H, A185P, M186V, K192T, G196V, Q205P, Q206R, L220I                                                  | m      | 9               |
| 202 | TEML-145 | P226L, R244L, A248E                                                                                                         | m      | 2               |
| 145 | TEML-134 | P183L, A184Y                                                                                                                | m      | 2               |
| 140 | TEM-60   | Q39K, L51P, E104K, R164S, A187R, S223C, F230L                                                                               | m      | 4               |
| 772 | TEML-364 | N-13, I282K, C-8                                                                                                            | m      | 2               |
| 754 | TEML-359 | N-23, A150D, H153R, N154Q, M155I, H158K, V159E, W165I, E168D, A172G, I173K, P174L, N175G, E177L, M182T, A184K, M186I, T188S | m      | 16              |
| 159 | TEML-87  | N-8, V84I, L102M, E121G, A184V, G218E, C-6                                                                                  | m      | 3               |

**Table S2 continued**

| ID  | Name     | Mutations                                                                      | Reason | Lowest identity |
|-----|----------|--------------------------------------------------------------------------------|--------|-----------------|
| 21  | TEML-243 | N-23, P62S, V80I, V84I, E147G, M182T, A184V, L201P, I208M, A224V, I247V, R275L | m      | 9               |
| 723 | TEML-97  | N-1, L21F, E104K, R164S, M182T, I282E, C-8                                     | m/f    | 3               |
| 244 | TEML-91  | N-8, V84I, H96R, A184V, A248T, G255S, C-6                                      | m      | 2               |
| 647 | TEM-123  | Q6K, E104K, G238S, A248-, R275A                                                | m      | 2               |
| 334 | TEML-139 | E104D, Y105A                                                                   | m      | 2               |
| 201 | TEML-292 | W165-, E166G, P167T                                                            | m      | 3               |
| 379 | TEM-152  | M69V, R164H, E240K, N276D                                                      | m      | 2               |
| 189 | TEM-193  | N136H, L138F, R164C, E166G, E168K, N170T, N175H, M186V, T188N, L220I           | m      | 8               |
| 91  | TEML-80  | N-8, V84I, T133A, R178H, A184V, C-6                                            | m      | 2               |
| 214 | TEML-84  | N-8, K73R, V84I, L113P, A184V, C-7                                             | m      | 3               |
| 508 | TEM-195  | Q99R, R164C, N175H, M186V                                                      | m      | 3               |
| 558 | TEML-44  | S4D, I5P, L21F, R164S, T265M, C-9                                              | m      | 3               |
| 41  | TEM-59   | Q39K, S130G, C-9                                                               | m      | 3               |
| 688 | TEML-158 | G283E, A284K, S285Q, 286--KC--287, I287T, K288D, C-2                           | m      | 2               |
| 260 | TEML-302 | N-23, M68L, M69T                                                               | m      | 2               |
| 116 | TEML-76  | N-8, R65H, V84I, A184V, E240K, C-6                                             | m      | 2               |
| 616 | TEML-343 | N-23, S70G, W165Y, E166Y, P167G                                                | m      | 2               |
| 381 | TEM-178  | A42S, R43T, V44S, P145S, K146Q, R178A, E212-, G238R                            | m      | 8               |
| 544 | TEML-82  | N-8, V33A, K34N, V84I, A184V, I260F, C-6                                       | m      | 3               |
| 605 | TEML-191 | Q6S, N276M, R277S, A280V, E281D, I282M, A284G                                  | m      | 5               |
| 42  | TEM-211  | Q6K, E104K, S130T, M182T, G238S, R275L                                         | m      | 2               |
| 6   | TEML-147 | F60L, V84I, T140A, A184V, P219S                                                | m      | 2               |
| 694 | TEML-143 | V84I, I173K, A184V, K234T                                                      | m      | 2               |
| 456 | TEML-319 | N-13, M182T, C-10                                                              | f      | 2               |
| 439 | TEML-88  | N-8, M69V, C77R, V84I, A184V, C-6                                              | m      | 2               |

**Table S2 continued**

| ID  | Name     | Mutations                                                                                                                         | Reason | Lowest identity |
|-----|----------|-----------------------------------------------------------------------------------------------------------------------------------|--------|-----------------|
| 546 | TEM-124  | Q6K, E104K, M182T, A248-, R275A                                                                                                   | m      | 2               |
| 407 | TEML-239 | P257S, R259H                                                                                                                      | m      | 2               |
| 775 | TEML-365 | N-23, V84I, E104Y, Y105N                                                                                                          | m      | 2               |
| 243 | TEML-96  | N-8, F16S, V84I, N175I, A184V, L193P, C-6                                                                                         | m      | 2               |
| 551 | TEM-164  | L40V, I279T                                                                                                                       | m      | 2               |
| 148 | TEML-102 | N-8, C77R, V84I, A184V, V262I, C-10                                                                                               | m      | 3               |
| 700 | TEML-204 | N-19, V23A, V84I, A184V, K192E, I246V, C-4                                                                                        | m      | 2               |
| 157 | TEML-85  | N-8, F60L, V84I, P107S, A184V, C-6                                                                                                | m      | 2               |
| 432 | TEML-317 | V84I, A184V, P257X, S258X, R259X, I260X, V261X, V262X, I263X, Y264X, T265X, 266--YRSYLHDGE--267, T266S, S268N, Q269Y, A270G, C-20 | m      | 25              |
| 284 | TEML-79  | N-8, V31A, V84I, A184V, V262A, C-6                                                                                                | m      | 2               |
| 933 | TEM-173  | A213V, R244S, N276K                                                                                                               | m      | 2               |
| 204 | TEM-108  | S4D, I5P, V80E, G196S, N276S                                                                                                      | m      | 2               |
| 401 | TEM-182  | M69I, W165L, R275L                                                                                                                | m      | 2               |
| 918 | TEM-50   | M69L, E104K, G238S, N276D                                                                                                         | m      | 2               |
| 677 | TEML-140 | A25V, H26R, A184V, L250V                                                                                                          | m      | 2               |
| 147 | TEML-156 | G78D, A79T, V80L, V84I, R178S, A184V, A187P, P257R                                                                                | m      | 4               |
| 268 | TEML-98  | N-8, V84I, I95T, N136D, T140A, A184V, W210R, C-6                                                                                  | m      | 3               |
| 531 | TEML-330 | N-2, I5M, F16L, A17R, A18H, C20A, L21F, P22-, V23L, A25C, H26S, E28R, T29N, L30A, V31G, K32E, T71A, V84I, A184V                   | m      | 6               |
| 191 | TEML-291 | N-23, W165Y, E166Y, P167G, L201P                                                                                                  | m      | 2               |
| 223 | TEML-205 | N-28, V31M                                                                                                                        | m      | 5               |
| 238 | TEML-296 | D115E, M117K, L162X                                                                                                               | m      | 3               |
| 542 | TEML-201 | N-11, S53X, M182T, C-11                                                                                                           | m      | 2               |
| 561 | TEML-334 | N-16, M69X, W165X, N276X                                                                                                          | m      | 3               |

**Table S2 continued**

| ID  | Name     | Mutations                                          | Reason | Lowest identity |
|-----|----------|----------------------------------------------------|--------|-----------------|
| 336 | TEML-253 | M129I, S130A, A184V, 290--<br>VTVRPSLLIYTLD        | l      | 2               |
| 533 | TEML-40  | R204W, M211V, C-2                                  | m      | 2               |
| 414 | TEM-187  | L21F, R164H, A184V, T265M, C-1                     | m      | 2               |
| 663 | TEML-92  | N-8, F15S, E37G, E63K, V84I, A184V, C-6            | m      | 2               |
| 304 | TEML-104 | N-8, E58G, V84I, Y97C, A184V, A202T, C-<br>9       | m      | 4               |
| 712 | TEML-99  | N-8, H26L, D101G, R164H, A184V,<br>P252L, C-6      | m      | 4               |
| 406 | TEML-255 | E48X, E281X, I282X, G283X, A284X                   | m      | 5               |
| 766 | TEML-83  | N-8, S70G, F72L, V84I, A184V, L190M, C-<br>6       | m      | 2               |
| 19  | TEML-221 | N-15, H153X, C-11                                  | m      | 3               |
| 659 | TEML-42  | P145X, T181X, A184V, I263X, T265P,<br>I287D, C-3   | m      | 4               |
| 575 | TEML-337 | N-23, V84I, E104A, Y105A                           | m      | 2               |
| 75  | TEM-42   | N-3, Q39K, A42V, G238S, E240K, T265M,<br>C-2       | m      | 2               |
| 387 | TEM-101  | Q39K, G238S, E240K, A280V                          | m      | 2               |
| 219 | TEML-153 | P27F, E28D, T29L, K32F, A36C, S82F,<br>V84I, A184V | m      | 6               |
| 13  | TEML-94  | N-8, V84I, D179G, A184V, R222C, F230L,<br>C-6      | m      | 3               |
| 782 | TEM-130  | D35P, Q39K, E104K, R164S, A237T                    | m      | 2               |
| 3   | TEML-89  | N-8, A11G, S82F, V84I, T141A, E177G,<br>A184V, C-6 | m      | 3               |
| 34  | TEML-78  | N-8, V84I, A184V, G228S, C-7                       | m/f    | 2               |
| 539 | TEM-162  | E28K, D38N, E64K, V84I, N100S, L102V,<br>A184V     | m      | 4               |

**Table S3** Nodes that were identified in the clustering process. The order of their removal is given in the column "order of removal".

| Order of removal | ID  | Variant        | Mutations                        | Relative betweenness |
|------------------|-----|----------------|----------------------------------|----------------------|
| 1                | 818 | TEM-1 (N-23)   |                                  | 207,81               |
| 2                | 783 | TEM-116        | V84I, A184V                      | 66,92                |
| 3                | 640 | TEM-12         | R164S                            | 31,94                |
| 4                | 416 | TEM-2          | Q39K                             | 35,98                |
| 5                | 386 | TEM-33         | M69L                             | 29,59                |
| 6                | 568 | TEM-135        | M182T                            | 39,41                |
| 7                | 393 | TEM-63         | L21F, E104K, R164S, M182T        | 48,85                |
| 8                | 313 | TEM-110        | L21F, T265M                      | 31,51                |
| 9                | 65  | TEM-15         | E104K, G238S                     | 28,02                |
| 10               | 779 | TEM-52         | E104K, M182T, G238S              | 28,60                |
| 11               | 526 | TEM-35         | M69L, N276D                      | 13,15                |
| 12               | 152 | TEM-129        | Q39K, E104K, R164S               | 12,82                |
| 13               | 10  | TEM-29         | R164H                            | 13,42                |
| 14               | 358 | TEM-16         | Q39K, E104K, R164H               | 17,25                |
| 15               | 441 | TEM-85         | L21F, R164S, E240K, T265M        | 21,09                |
| 16               | 911 | TEM-36         | M69V, N276D                      | 11,81                |
| 17               | 509 | TEM-84         | N276D                            | 13,20                |
| 18               | 376 | TEM-3          | Q39K, E104K, G238S               | 11,10                |
| 19               | 286 | TEM-19         | G238S                            | 8,28                 |
| 20               | 455 | TEM-10         | R164S, E240K                     | 8,17                 |
| 21               | 9   | TEM-155        | Q39K, R164S, E240K               | 9,16                 |
| 22               | 63  | TEM-47         | G238S, E240K, T265M              | 6,92                 |
| 23               | 197 | TEM-30, TEM-99 | R244S                            | 6,71                 |
| 24               | 111 | TEM-181        | A184V                            | 6,55                 |
| 25               | 914 | TEM-39         | M69L, W165R, N276D               | 5,45                 |
| 26               | 371 | TEM-17         | E104K                            | 5,38                 |
| 27               | 909 | TEM-31         | R244C                            | 5,09                 |
| 28               | 64  | TEM-34, TEM-97 | M69V                             | 4,91                 |
| 29               | 690 | TEM-28         | R164H, E240K                     | 4,89                 |
| 30               | 195 | TEM-6          | E104K, R164H                     | 4,22                 |
| 31               | 232 | TEM-24         | Q39K, E104K, R164S, A237T, E240K | 4,00                 |
| 32               | 658 | TEM-4          | L21F, E104K, G238S, T265M        | 3,00                 |
| 33               | 901 | TEM-5          | R164S, A237T, E240K              | 2,40                 |
| 34               | 919 | TEM-51         | R244H                            | 2,33                 |
| 35               | 670 | TEM-154        | M69L, R164S                      | 1,60                 |



**Table S3 continued**

| Order of removal | ID  | Variant  | Mutations                                | Relative betweenness |
|------------------|-----|----------|------------------------------------------|----------------------|
| 36               | 681 | TEM-93   | M182T, G238S, E240K                      | 1,50                 |
| 37               | 128 | TEM-45   | M69L, R275Q                              | 1,33                 |
| 38               | 14  | TEML-124 | V84I, A184V, A284L                       | 1,00                 |
| 39               | 60  | TEM-169  | M69L, W165G                              | 1,00                 |
| 40               | 156 | TEML-199 | A184X                                    | 1,00                 |
| 41               | 345 | TEML-95  | N-8, F19S, F24L, V84I, S106P, A184V, C-6 | 1,00                 |
| 42               | 440 | TEM-106  | E104K, M182T                             | 1,00                 |
| 43               | 69  | TEML-275 | A184V, E240G, W290L                      | 0,67                 |
| 44               | 515 | TEM-144  | R164C, E240K                             | 0,67                 |
| 45               | 566 | TEM-215  | H153R                                    | 0,67                 |
| 46               | 576 | TEM-40   | M69I                                     | 0,67                 |
| 47               | 713 | TEM-11   | Q39K, R164H                              | 0,67                 |
| 48               | 903 | TEM-9    | L21F, E104K, R164S, T265M                | 0,67                 |
| 49               | 920 | TEM-56   | Q39K, E104K, H153R                       | 0,67                 |
| 50               | 396 | TEM-122  | R275Q                                    | 0,25                 |
| 51               | 913 | TEM-38   | M69V, R275L                              | 0,67                 |

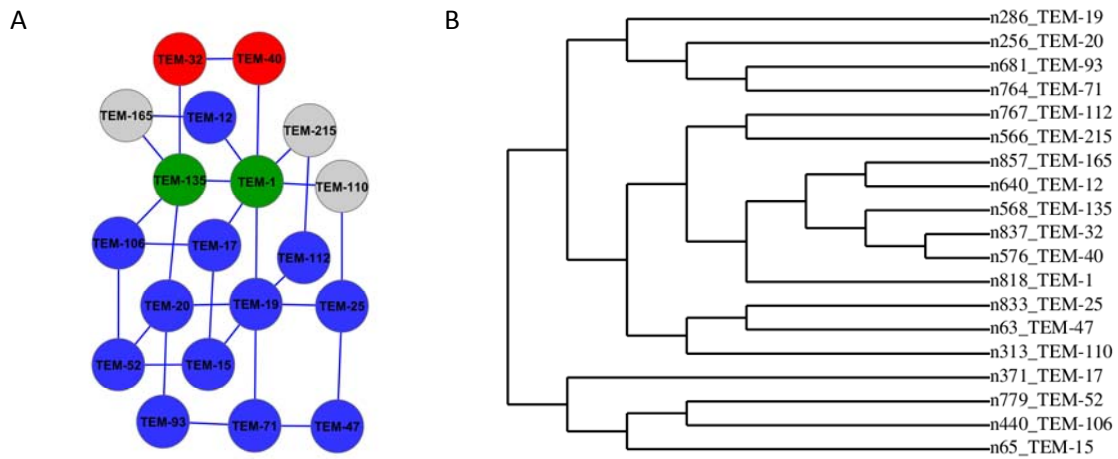

**Figure S1** Comparison between representations of a set of TEM variants as phylogenetic tree and as a network. Tree was created on [www.phylogeny.fr](http://www.phylogeny.fr) [1]

- [1] **Dereeper A, Audic S, Claverie J-M, Blanc G.** 2010. BLAST-EXPLORER helps you building datasets for phylogenetic analysis. *BMC Evol. Biol.* **10**:8
